# Supplementary material for: The Relationship between Metabolic Syndrome and Plasma Metals Modified by EGFR and TNF-α Gene Polymorphisms
Source: MDPI journal article supplement (doi:10.3390/toxics9090225), 2021-09-16
Supplement: s1 [file s1]

## Article

# The Relationship between Metabolic Syndrome and Plasma Metals Modified by EGFR and TNF- $\alpha$ Gene Polymorphisms

Tzu-Hua Chen, Wei-Shyang Kung, Hung-Yu Sun, Joh-Jong Huang, Jia-Yi Lu, Kuei-Hau Luo and Hung-Yi Chuang

**Table S2.** Demographic characteristics, physical and biochemical data, and plasma metal concentrations of two groups of participants.

| Variable                 | Total<br>n = 1015    | Non-metal workers<br>n = 639 | Metal workers<br>n = 376 | p value |
|--------------------------|----------------------|------------------------------|--------------------------|---------|
| MetS                     | 181 (17.8)           | 81 (12.7)                    | 100 (26.6)               | <0.001  |
| Gender                   |                      |                              |                          | 0.057   |
| Male                     | 520 (51.2)           | 340 (53.2)                   | 180 (47.9)               |         |
| Female                   | 495 (48.8)           | 299 (46.8)                   | 196 (52.1)               |         |
| Smoking                  | 213 (21.0)           | 90 (14.1)                    | 123 (32.7)               | <0.001  |
| Drinking alcohol         | 37 (3.7)             | 30 (4.8)                     | 7 (1.9)                  | 0.011   |
| Age (year)               | 43.76 $\pm$ 10.11    | 43.50 $\pm$ 9.65             | 44.18 $\pm$ 10.83        | 0.301   |
| BMI (kg/m <sup>2</sup> ) | 24.41 $\pm$ 3.96     | 24.04 $\pm$ 3.45             | 25.05 $\pm$ 4.62         | <0.001  |
| WC (cm)                  | 81.72 $\pm$ 11.19    | 81.98 $\pm$ 10.78            | 81.30 $\pm$ 11.86        | 0.351   |
| SBP (mmHg)               | 117.98 $\pm$ 16.68   | 115.30 $\pm$ 16.37           | 122.53 $\pm$ 16.23       | <0.001  |
| DBP (mmHg)               | 72.19 $\pm$ 11.45    | 73.01 $\pm$ 11.16            | 70.79 $\pm$ 11.81        | 0.003   |
| Sugar (mg/dL)            | 94.52 $\pm$ 25.39    | 92.65 $\pm$ 17.86            | 97.70 $\pm$ 34.41        | 0.002   |
| TG (mg/dL)               | 126.55 $\pm$ 117.25  | 117.76 $\pm$ 93.32           | 141.49 $\pm$ 148.33      | 0.002   |
| HDL-C (mg/dL)            | 51.59 $\pm$ 13.91    | 55.10 $\pm$ 13.69            | 45.62 $\pm$ 12.15        | <0.001  |
| TC (mg/dL)               | 202.24 $\pm$ 37.33   | 198.15 $\pm$ 35.36           | 209.20 $\pm$ 39.54       | <0.001  |
| Uric acid (mg/dL)        | 5.76 $\pm$ 1.55      | 5.75 $\pm$ 1.57              | 5.76 $\pm$ 1.52          | 0.927   |
| ALT (IU/L)               | 26.16 $\pm$ 19.63    | 24.93 $\pm$ 18.99            | 28.26 $\pm$ 20.53        | 0.009   |
| Creatinine (mg/dL)       | 0.77 $\pm$ 0.18      | 0.79 $\pm$ 0.18              | 0.75 $\pm$ 0.16          | 0.001   |
| Co ( $\mu$ g/L)          | 0.85 $\pm$ 0.29      | 0.78 $\pm$ 0.29              | 0.97 $\pm$ 0.26          | <0.001  |
| Cu ( $\mu$ g/L)          | 1001.97 $\pm$ 270.83 | 950.29 $\pm$ 265.75          | 1088.93 $\pm$ 257.00     | <0.001  |
| Zn ( $\mu$ g/L)          | 849.68 $\pm$ 275.77  | 791.36 $\pm$ 258.86          | 947.82 $\pm$ 275.82      | <0.001  |
| Se ( $\mu$ g/L)          | 207.54 $\pm$ 107.33  | 146.12 $\pm$ 46.65           | 311.91 $\pm$ 100.48      | <0.001  |
| As ( $\mu$ g/L)          | 6.07 $\pm$ 8.07      | 4.76 $\pm$ 3.35              | 8.31 $\pm$ 12.20         | <0.001  |
| Pb ( $\mu$ g/L)          | 0.33 $\pm$ 0.52      | 0.05 $\pm$ 0.04              | 0.83 $\pm$ 0.58          | <0.001  |

Data are presented as n(%) or mean  $\pm$  standard deviation. MetS—metabolic syndrome; BMI—body mass index; WC—waist circumference; SBP—systolic blood pressure; DBP—diastolic blood pressure; TG—triglyceride; HDL-C—high-density lipoprotein cholesterol; TC—total cholesterol; ALT—alanine aminotransferase.
